# Supplementary material for: Enhanced Biodegradability in Soil of Chicken Feather by Steam Explosion for Potential Application in Agricultural Biodegradable Plastics
Source: MDPI journal article supplement (doi:10.3390/polym15183701), 2023-09-08
Supplement: s1 [file s1]

## Supplementary material

### Enhanced biodegradability in soil of chicken feather by steam explosion for potential application in agricultural biodegradable plastics

Julen Vadillo<sup>1,\*</sup>, Sarah Montes<sup>1</sup>, Hans-Jürgen Grande<sup>1,2</sup>, Steven Verstichel<sup>3</sup>, Jonna Almqvist<sup>4</sup>, Krystyna Wrześniewska-Tosik<sup>5</sup>.

<sup>1</sup> CIDETEC, Basque Research and Technology Alliance (BRTA), Paseo Miramón, 196,

20014 Donostia-San Sebastián, Spain

<sup>2</sup> University of the Basque Country (UPV/EHU), Advanced Polymers and Materials: Physics, Chemistry and Technology Department, Avda. Tolosa 72, 20018, Donostia-San Sebastian, Spain

<sup>3</sup> Normec OWS, Panterschipstraat 1639000, Gent Belgium

<sup>4</sup> RISE Research Institutes of Sweden, Department of Biorefinery and Energy, S-892 50 Örnköldsvik, Sweden

<sup>5</sup> Łukasiewicz Research Network- Łódź Institute of Technology, ul. Skłodowskiej-Curie 19/27 90-570 Łódź, Poland

\* Corresponding author: [jvadillo@cidetec.es](mailto:jvadillo@cidetec.es)

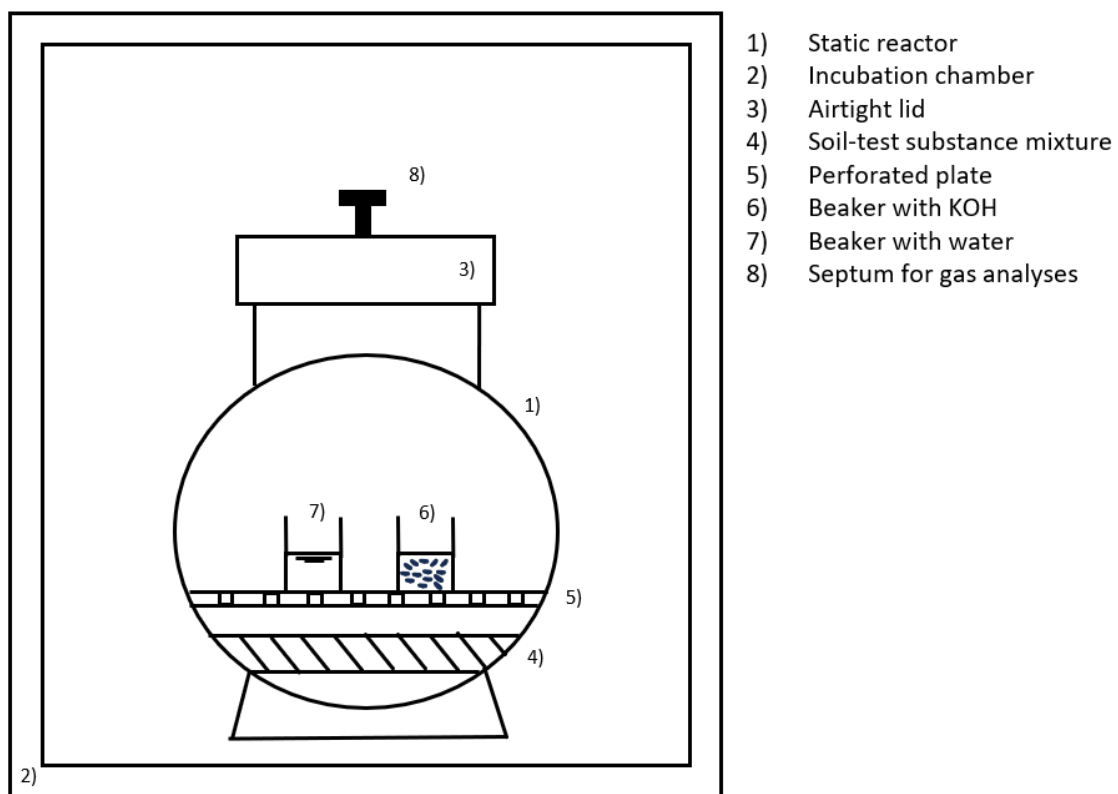

**Figure S1.** Diagram of the Biodegradation test setup

**Table S1.** Elemental analysis of raw and treated feathers at different SE conditions.

| Reference              | Content (%) |      |     |     |        |
|------------------------|-------------|------|-----|-----|--------|
|                        | N           | C    | H   | S   | Others |
| Raw chicken feathers   | 14.6        | 48.2 | 7.2 | 2.3 | 27.7   |
| CF-SE-160°C-2min-0.5mm | 14.4        | 48.2 | 7.3 | 2.2 | 27.9   |
| CF-SE-160°C-4min-0.5mm | 14.3        | 46.8 | 7.4 | 2.1 | 29.4   |
| CF-SE-180°C-2min-0.5mm | 14.4        | 47.6 | 7.3 | 2.0 | 28.7   |
| CF-SE-190°C-4min-0.5mm | 14.9        | 48.7 | 7.3 | 1.8 | 27.3   |

**Table S2.** Initial degradation and maximum degradation temperature of feather treated with different SE conditions

| Reference              | Severity factor | Td <sub>5%</sub> (°C) | Td <sub>10%</sub> (°C) | Td <sub>max1</sub> (°C) |
|------------------------|-----------------|-----------------------|------------------------|-------------------------|
| Raw Chicken feathers   | -               | 53                    | 165                    | 316                     |
| CF-SE-160°C-2min-0.5mm | 2.07            | 59                    | 183                    | 322                     |
| CF-SE-160°C-4min-0.5mm | 2.37            | 63                    | 185                    | 321                     |
| CF-SE-180°C-2min-0.5mm | 2.66            | 69                    | 189                    | 323                     |
| CF-SE-190°C-4min-0.5mm | 3.25            | 74                    | 190                    | 324                     |

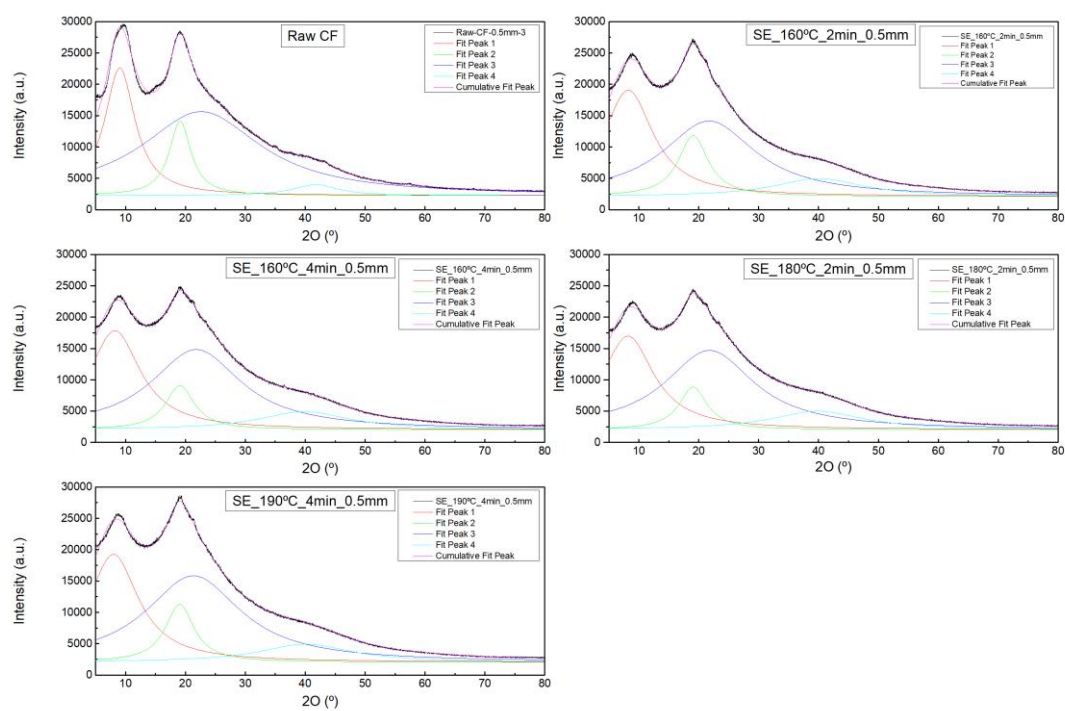

**Figure S2.** Representative deconvolution of XRD diffractograms of raw and SE feathers.
